# Supplementary material for: Hydrothermal syntheses of a series of cluster-based micro-porous luminescent cadmium(ii) metal–organic frameworks with 4-amino-benzene-1,2,4-triazole: topological diversity, gas absorption and photo-luminescent characterization
Source: Royal Society of Chemistry journal article supplement (doi:10.1039/c4ra03077j), 2014-01-01
Supplement: c4ra03077j1.pdf [file c4ra03077j1.pdf]

## ***Supporting information***

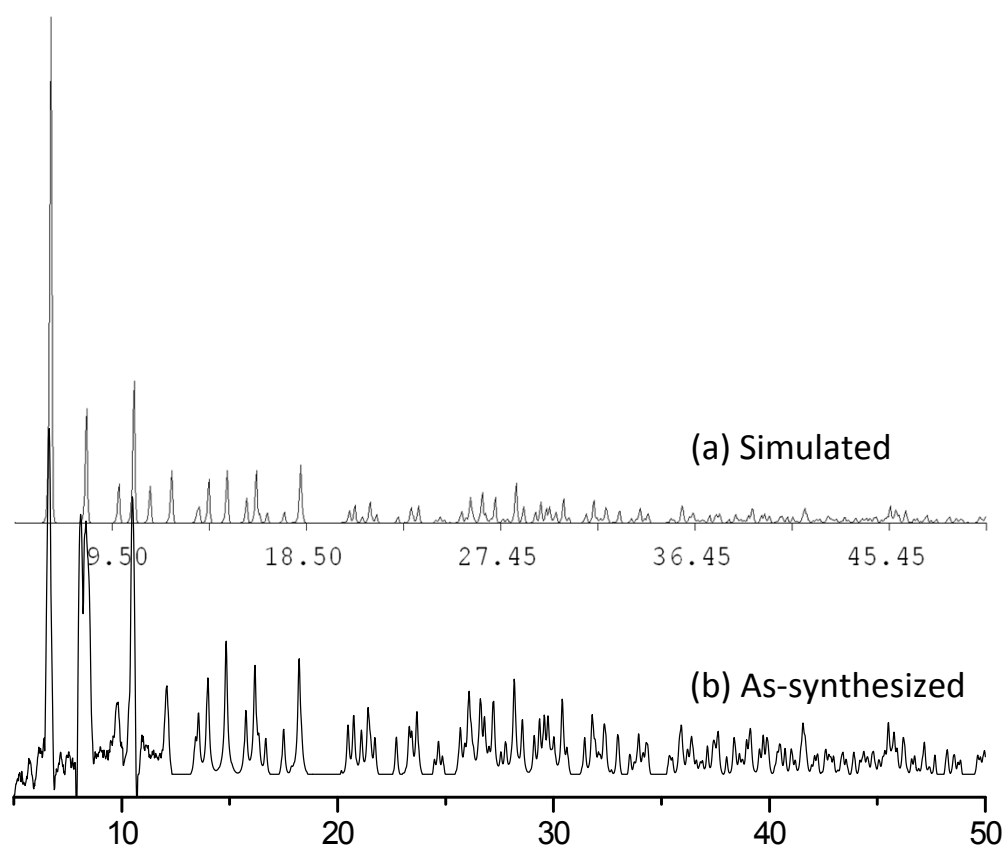

**Fig. S1** X-Ray powder patterns for **1**: (a) calculated on the basis of the structure determined by single-crystal X-ray diffraction. (b) X-ray diffractograms of an original sample of **1**.

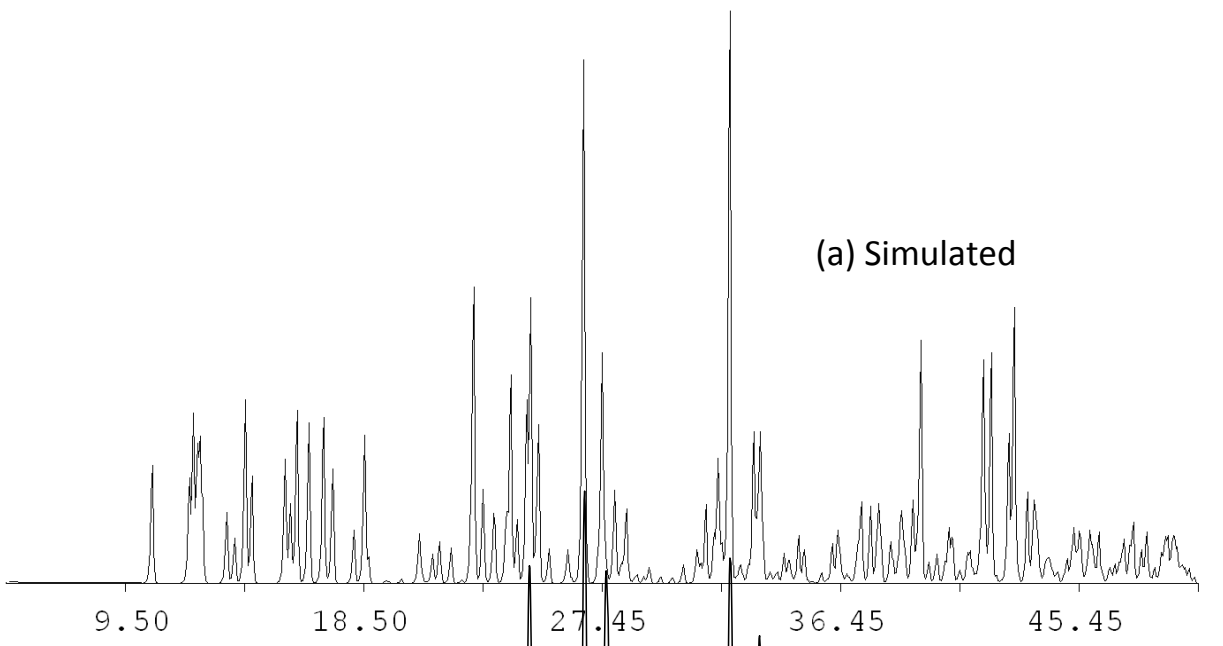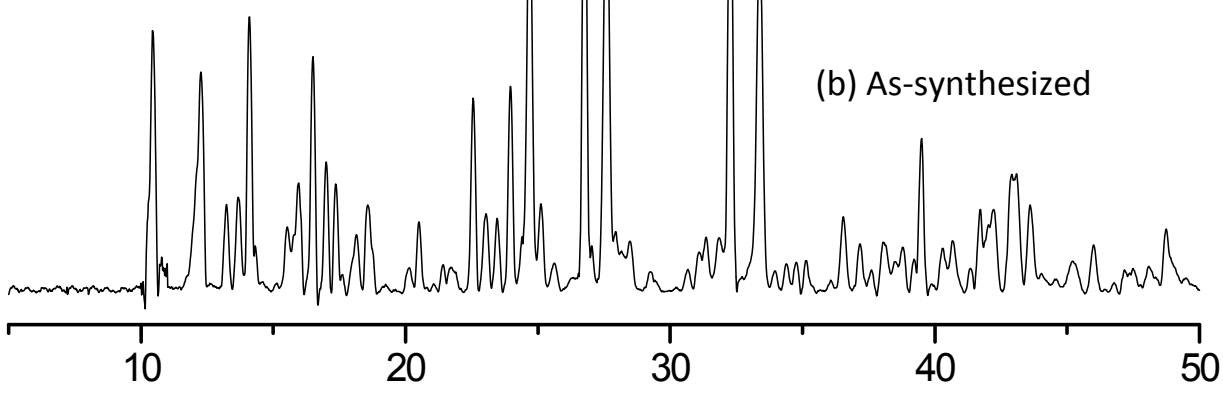

**Fig. S2** X-Ray powder patterns for **2**: (a) calculated on the basis of the structure determined by single-crystal X-ray diffraction. (b) X-ray diffractograms of an original sample of **2**.

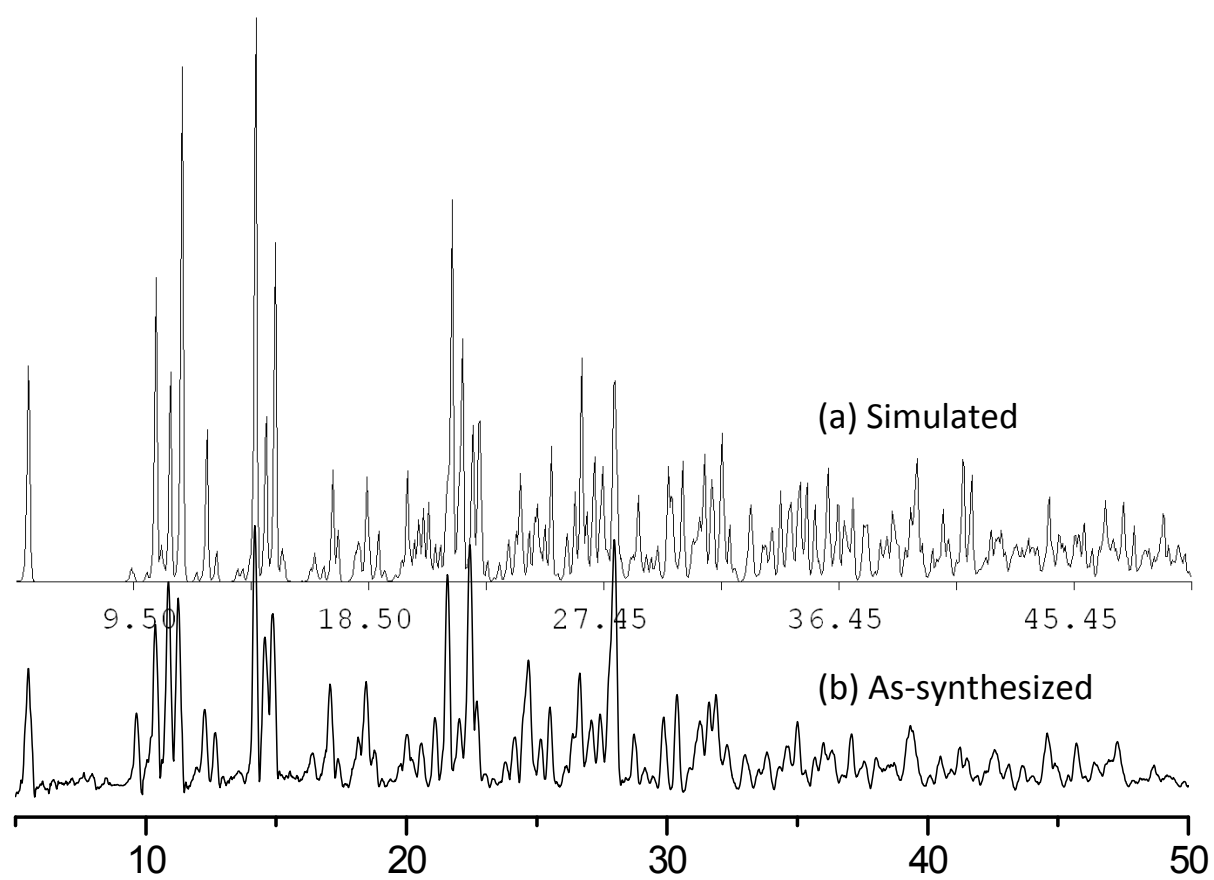

**Fig. S3** X-Ray powder patterns for **3**: (a) calculated on the basis of the structure determined by single-crystal X-ray diffraction. (b) X-ray diffractograms of an original sample of **3**.
